1 **Title: Postpartum Depression During the COVID-19 Pandemic and Associated**  
2 **Factors: A Cross-Sectional Study**

3 **Authors:** Mariana Mie Teruya<sup>1</sup>; Gabriel Sant'Ana Carrijo<sup>2</sup>; Gleise Aparecida Moraes  
4 Costa<sup>2</sup>; Mariliza Henrique Da Silva<sup>3</sup>; Júlia Ribeiro Targa de Lima<sup>2</sup>; Julia Fontanezzi  
5 Sacramento Veltri Costa<sup>4</sup>; Rodolfo Strufaldi<sup>2</sup>; Cristina Ortiz Sobrinho Valete <sup>5</sup>

6 **Author Affiliations**

7 <sup>1</sup> Faculdade de Ciências Médicas da Santa Casa de São PauloFac

8 <sup>2</sup> Centro Universitário Faculdade de Medicina do ABC

9 <sup>3</sup> Hospital Municipal Universitário de São Bernardo do Campo

10 <sup>4</sup> Secretaria de Saúde de São Bernardo do Campo

11 <sup>5</sup> Universidade Federal de São Carlos

12

13 **Corresponding author:** Mariana Mie Teruya. ORCID 0000-0001-8133-5782.

14 Faculdade de Ciências Médicas da Santa Casa de São Paulo. E-mail:

15 [marimies2@gmail.com](mailto:marimies2@gmail.com)

16

17 **Keywords:** Postpartum Depression, Maternal Health, COVID-19, Pandemic, Cross-  
18 sectional study, Edinburgh Postnatal Depression Scale, Postpartum Period.

19

20

21

22 **Abstract**

23 **Objective:** To study the prevalence of maternal depressive symptoms in the immediate  
24 postpartum period ( $\leq 7$  days postpartum) during the COVID-19 pandemic and to identify  
25 associated factors.

26  
27 **Methods:** We performed a cross-sectional analytical study. The study population  
28 consisted of postpartum women  $>18$  years old enrolled at the Municipal University  
29 Hospital of São Bernardo do Campo. The Edinburgh Postnatal Depression Scale and a  
30 questionnaire on sociodemographic characteristics and clinical history were administered  
31 to 90 patients in the first week of the immediate postpartum period between June and  
32 December 2021.

33  
34 **Results:** An Edinburgh Postnatal Depression Scale score  $> 10$  was observed in 39  
35 (43.3%) of the postpartum women. From a multivariate analysis, the factors associated  
36 with a score  $> 10$  on the scale were: "having no belief/spirituality" with 83% (95% CI 1.20-  
37 2.81,  $p<0.006$ ), "having had more than one pregnancy" with 50% (95% CI 0.29-0.89,  
38  $p<0.02$ ), "having a previous episode of depression" with 64% (95% CI 1.02-2.65,  $p<0.04$ ),  
39 and "having a previous episode of anxiety" with 83% (95% CI 1.06-3.16,  $p<0.03$ ). The  
40 other factors studied did not have statistical significance.

41  
42 **Conclusion:** With the COVID-19 pandemic, an increase in the prevalence of depressive  
43 symptoms in the immediate postpartum period was observed. The postpartum women

44 who scored > 10 on the EPDS had the following common associated factors: "having no  
45 belief/spirituality", "having had more than one pregnancy", "having a previous episode of  
46 depression", and "having a previous episode of anxiety". These findings indicate the need  
47 for greater attention from health professionals to these positive factors.

48

49

50

51

52

53

54

55

56

## 57 **Introduction**

58

59 Postpartum depression (PPD), also known as peripartum depression, is a prevalent  
60 and debilitating condition affecting a significant number of women after childbirth. It is  
61 defined by the presence of major depression criteria associated with pregnancy or up to  
62 4 weeks postpartum, according to the "Diagnostic and Statistical Manual of Mental  
63 Disorders (DSM-V) - 2013." (1). In Brazil, approximately 15% to 28% of women develop

64 PPD (2). Despite its high prevalence, less than 20% of obstetric teams focus on  
65 diagnosing and treating mental disorders during prenatal care, which is a predictor for  
66 PPD (2,3).

67 The pathophysiology of PPD is complex and not fully understood, yet its symptoms  
68 can profoundly impact the lives of mothers, their babies, and their families(4). In mothers,  
69 untreated PPD is associated with weight problems, impaired social relationships,  
70 decreased maternal attachment, use of alcohol and/or illicit drugs, persistent depression,  
71 and even suicide (4,5).

72 The COVID-19 pandemic has led to several mandatory prevention regulations,  
73 changes in healthcare services, unprecedented unemployment rates, financial stress, and  
74 emotional worries. In this context, the global prevalence of PPD ranged from 6.4% to  
75 56.9% (6), a much higher percentage when compared to the pre-pandemic period. In  
76 Brazil, about 38.8% of postpartum women had symptoms consistent with PPD, with the  
77 risk of PPD increasing by 2.3 times when the postpartum woman was hospitalized due to  
78 COVID-19 infection (7). Given the importance of this issue, this study aims to analyze the  
79 prevalence of PPD symptoms in the immediate postpartum period and identify associated  
80 factors during the COVID-19 pandemic in a Brazilian obstetric health center.

## 81 **Methods:**

82 This is a cross-sectional study conducted in a hospital located in São Paulo, Brazil,  
83 from June 2021 to December 2021. This study was approved by the Faculty of Medicine  
84 of ABC ethics committee (CAAE: 43879521.0.0000.0082) and informed consent was  
85 obtained from all participants. This health care center is a tertiary teaching hospital

86 accredited by Baby Friendly Hospital Initiative, located in the ABC region. The maternity  
87 ward is a reference for high-risk pregnancies. The neonatal intensive care unit has 20  
88 beds, with a multidisciplinary team working in the areas of audiology and speech therapy,  
89 occupational therapy, psychology, social work, and physiotherapy, in addition to the  
90 medical, nursing, and specialist teams.

91 Inclusion criteria were women in the first week of postpartum, aged >18 years.  
92 Exclusion criteria were patients who did not adequately answer the Edinburgh Postnatal  
93 Depression Scale (EPDS) or who did not consent to partaking in the research.

94 Sociodemographic and clinical characteristics were investigated. The EPDS was  
95 applied to all participants, as a screening tool for PPD. The EPDS is a self-applied  
96 questionnaire developed by Cox et al (8), composed by ten items with answers in a four-  
97 level Likert scale, translated and validated to Brazil by Santos et al (9). The outcome  
98 variable considered was PPD, defined according to a positive screening by EPDS  $\geq 10$ , as  
99 suggested by Figueira et al (10). Other data were collected from electronic charts.  
100 Whenever necessary, when the EPDS was  $\geq 10$  or when asked by themselves, women  
101 were encouraged to follow the institution's mental health service.

102 Statistical analysis: All statistical analyses were done using Stata software version  
103 13. Sample power was calculated considering 20% difference, by the Wald statistics and  
104 the sample comprising 90 participants, resulting in 0.9854. Normality was evaluated by  
105 the Shapiro-Wilk test (p-value < 0.001). Results are presented as medians and  
106 interquartile range (IQR), frequency, proportions and 95% confidence intervals (95% CI).  
107 Crude prevalence ratios (CPr) were calculated by the Poisson regression (robust

108 estimation and log link function) considering the outcome PPD (yes/no). Variables with a  
109  $p < 0.20$  were tested in a multivariate model to estimate the adjusted prevalence ratios  
110 (APr). For all analyses, a  $p < 0.05$  was considered statistically significant. This article  
111 writing followed the STROBE form for cross-sectional studies (11).

112

### 113 **Results:**

114 The study included 90 participants. The median age was 27.5 years (IQR 23-34),  
115 25 (27.8%) self-identified as white, 54 (60.0%) as brown and 11 (12.2%) as black.  
116 Regarding the educational level, 64 (71.1%) had high school diploma and 11 (12.2%) had  
117 university degree.

118 Twenty-eight (31.1%) were married and 30 (33.3%) were single. Regarding  
119 religion, 29 (32.2%) were catholic, 37 (41.1%) were evangelical and 17 (18.9%) reported  
120 not having a religion. Sixty-eight (77.3%) reported having a spiritual belief. Those who  
121 reported not having a spiritual belief believed their lives' sense was represented by their  
122 infants in 10 (45.4%) and their family in 7 (31.8%). Thirteen (14.4%) had chronic disease  
123 and took some medicine during pregnancy. Seventy-five (83.3%) reported having a  
124 support network. Thirty-seven (41.1%) reported their family income decreased during the  
125 pandemic period. Their working conditions changed in 63 (70.0%), and of these, 38  
126 (60.3%) reported that these changes were negative. Sixty-four (71.1%) reported no  
127 alcohol intake habits before and during pregnancy and 22 (24.5%) reported alcohol intake  
128 before pregnancy with discontinuation upon discovery. Forty (44.4%) planned pregnancy,

129 thirty-eight (42.2%) reported a previous anxiety episode and 16 (17.8%) reported a  
130 previous depression episode.

131 The median body mass index (BMI) in the beginning of pregnancy was 25.0 (IQR  
132 21.7-30.1), in the end it was 30.1 (IQR 24.9-32.9) and median weight gain was 10 kg (IQR  
133 7-13). Twenty-nine (32.2%) had vaginal delivery and 61 (67.8%) were submitted to  
134 cesarean section. Eighty-nine were tested for COVID-19 and of these, 33 (37.0%) were  
135 positive.

136 Considering the newborns' characteristics, 48 (53.3%) were male sex, with median  
137 birth weight 3,157g (IQR 2,800-3,605g), median gestational age 39<sup>0/7</sup> weeks (IQR 38<sup>0/7</sup>-  
138 40<sup>0/7</sup> weeks), 87 (97.7%) reported the newborn was healthy and 79 (87.7%) reported they  
139 were in exclusive breastfeeding at that moment. Median EPDS score was 9 (IQR 5-12)  
140 and the detailed responses are in **Table 1**.

141 **Table 1** The Edinburgh Postnatal Depression Scale results (n=90)

| Questions                                                                                                                                                                                      | n (%)                                                               | Questions                                                                                                                                                                                                                                                                       | n (%)                                                               |
|------------------------------------------------------------------------------------------------------------------------------------------------------------------------------------------------|---------------------------------------------------------------------|---------------------------------------------------------------------------------------------------------------------------------------------------------------------------------------------------------------------------------------------------------------------------------|---------------------------------------------------------------------|
| <p><b>1. I have been able to laugh and see the funny side of things:</b></p> <p>As much as I always could</p> <p>Not quite so much now</p> <p>Definitely not so much now</p> <p>Not at all</p> | <p>58 (64.4)</p> <p>23 (25.6)</p> <p>8 (8.9)</p> <p>1 (1.1)</p>     | <p><b>6. Things have been getting to me:</b></p> <p>No, I have been coping as well as ever</p> <p>No, most of the time I have coped quite well</p> <p>Yes, sometimes I haven't been coping as well as usual</p> <p>Yes, most of the time I haven't been able to cope at all</p> | <p>11 (12.2)</p> <p>27 (30.0)</p> <p>36 (40.0)</p> <p>16 (17.8)</p> |
| <p><b>2. I have looked forward with enjoyment to things:</b></p> <p>As much as ever did</p> <p>Rather less than I used to</p> <p>Definitely less than I used to</p> <p>Hardly at all</p>       | <p>64 (71.1)</p> <p>19 (21.1)</p> <p>6 (6.7)</p> <p>1 (1.1)</p>     | <p><b>7. I have been so unhappy that I had difficulty sleeping:</b></p> <p>Yes, most of the time</p> <p>Yes, sometimes</p> <p>No, not very often</p> <p>No, not at all</p>                                                                                                      | <p>3 (3.3)</p> <p>8 (8.9)</p> <p>35 (38.9)</p> <p>44 (48.9)</p>     |
| <p><b>3. I have blamed myself unnecessarily when things went wrong:</b></p> <p>Yes, most of the time</p> <p>Yes, some of the time</p> <p>Not very often</p> <p>No, never</p>                   | <p>15 (16.7)</p> <p>37 (41.1)</p> <p>25 (27.8)</p> <p>13 (14.4)</p> | <p><b>8. I have felt sad or miserable:</b></p> <p>Yes, most of the time</p> <p>Yes, quite often</p> <p>Not very often</p> <p>No, not at all</p>                                                                                                                                 | <p>6 (6.7)</p> <p>9 (10.0)</p> <p>34 (37.8)</p> <p>41 (45.5)</p>    |
| <p><b>4. I have been anxious or worried for no good reason:</b></p> <p>No, not at all</p> <p>Hardly ever</p> <p>Yes, sometimes</p> <p>Yes, very often</p>                                      | <p>17 (18.9)</p> <p>22 (24.4)</p> <p>38 (42.2)</p> <p>13 (14.5)</p> | <p><b>9. I have been so unhappy that I have been crying:</b></p> <p>Yes, most of the time</p> <p>Yes, quite often</p> <p>Only occasionally</p> <p>No, never</p>                                                                                                                 | <p>5 (5.5)</p> <p>6 (6.7)</p> <p>42 (46.7)</p> <p>37 (41.1)</p>     |
| <p><b>5. I have felt scared or panicky for no good reason:</b></p> <p>Yes, quite a lot</p> <p>Yes, sometimes</p> <p>No, not much</p> <p>No, not at all</p>                                     | <p>6 (6.7)</p> <p>20 (22.2)</p> <p>34 (37.8)</p> <p>30 (33.3)</p>   | <p><b>10. The thought of harming myself has occurred to me:</b></p> <p>Yes, quite often</p> <p>Sometimes</p> <p>Hardly ever</p> <p>Never</p>                                                                                                                                    | <p>5 (5.6)</p> <p>2 (2.2)</p> <p>6 (6.7)</p> <p>77 (85.5)</p>       |



142           The EPDS  $\geq 10$  was observed in 39 (43.3%) of participants. Factors associated  
143 with this score were “not having a belief”, “previous depression episode” and “previous  
144 anxiety episode”. Number of gestations equal to one was associated with lower EPDS  
145 (Table 2).

146 **Table 2.** Univariate and multivariate regression model of EDPS  $\geq 10$  and associated  
147 factors (n=90).

| Characteristics                                                                         | EPDS $\geq 10$ (%) | CPr  | *p-value | APr          | 95% CI    | *p- value |
|-----------------------------------------------------------------------------------------|--------------------|------|----------|--------------|-----------|-----------|
| <b>Age</b><br>>35 years<br>$\leq 35$ years                                              | 30.0<br>47.1       | 0.63 | 0.21     | Not included |           |           |
| <b>Scholarity</b><br>Elementary<br>High school and university                           | 46.6<br>42.6       | 1.09 | 0.77     | Not included |           |           |
| <b>Have a belief</b><br>No<br>Yes                                                       | 60.0<br>38.2       | 1.56 | 0.06     | 1.83         | 1,20-2,81 | 0.006     |
| <b>Weight gain during pregnancy</b><br>>10 kg<br>$\leq 10$ kg                           | 38.1<br>47.1       | 0.79 | 0.35     | Not included |           |           |
| <b>Number of gestations</b><br>1<br>>1                                                  | 31.0<br>49.2       | 0.63 | 0.13     | 0.50         | 0,29-0,89 | 0.02      |
| <b>Was tested positive for COVID-19</b><br>Yes<br>No                                    | 48.5<br>39.3       | 1.23 | 0.39     | Not included |           |           |
| <b>During the pandemic your family income</b><br>Reduced<br>Did not change or increased | 54.0<br>35.8       | 1.50 | 0.08     | Not included |           |           |
| <b>Working conditions changes during the pandemic</b><br>Yes<br>No                      | 46.0<br>28.5       | 1.61 | 0.20     | Not included |           |           |
| <b>Did you have symptoms of COVID-19</b><br>Yes<br>No                                   | 46.6<br>41.6       | 1.12 | 0.64     | Not included |           |           |

|                                    |      |      |       |              |           |      |
|------------------------------------|------|------|-------|--------------|-----------|------|
| <b>Was your pregnancy planned</b>  |      |      |       |              |           |      |
| Yes                                | 40.0 | 1.17 | 0.51  | Not included |           |      |
| No                                 | 46.9 |      |       |              |           |      |
| <b>Use of sleep medication</b>     |      |      |       |              |           |      |
| Yes                                | 61.1 | 1.66 | 0.04  | Not included |           |      |
| No                                 | 36.7 |      |       |              |           |      |
| <b>Previous depression episode</b> |      |      |       |              |           |      |
| Yes                                | 75.0 | 2.07 | 0.001 | 1.64         | 1,02-2,65 | 0.04 |
| No                                 | 36.1 |      |       |              |           |      |
| <b>Previous anxiety episode</b>    |      |      |       |              |           |      |
| Yes                                | 60.5 | 1.96 | 0.006 | 1.83         | 1,06-3,16 | 0.03 |
| No                                 | 30.7 |      |       |              |           |      |
| <b>Ingestion of alcohol</b>        |      |      |       |              |           |      |
| Yes                                | 50.0 | 1.16 | 0.77  | Not included |           |      |
| No / stopped during pregnancy      | 43.0 |      |       |              |           |      |
| <b>Delivery</b>                    |      |      |       |              |           |      |
| Cesarean section                   | 24.1 | 0.46 | 0.03  | Not included |           |      |
| Vaginal                            | 52.4 |      |       |              |           |      |
| <b>Infant's sex</b>                |      |      |       |              |           |      |
| Male                               | 43.7 | 1.02 | 0.93  | Not included |           |      |
| Female                             | 42.8 |      |       |              |           |      |
| <b>Birth weight of infant</b>      |      |      |       |              |           |      |
| < 2,500g                           | 50.0 | 1.17 | 0.63  | Not included |           |      |
| ≥2,500g                            | 42.5 |      |       |              |           |      |
| <b>Gestational age</b>             |      |      |       |              |           |      |
| Preterm                            | 44.4 | 1.02 | 0.94  | Not included |           |      |
| Term                               | 43.2 |      |       |              |           |      |

148 CPr: Crude prevalence ratio; APr: Adjusted prevalence ratio; 95% CI: 95% confidence  
149 interval; \**p*-value associated with univariate and multivariate Poisson regression; EPDS:  
150 Edinburgh Postnatal Depression Scale; g: grams.

151

## 152 **Discussion:**

153 In this study, using the EPDS with a cutoff score of  $\geq 10$ , the prevalence of  
154 depressive symptoms in the immediate postpartum period ( $\leq 7$  days postpartum) was  
155 found to be 43.3% in the context of the COVID-19 pandemic. Pre-pandemic Brazilian  
156 studies that assessed the prevalence of depressive symptoms in the immediate  
157 postpartum period reported a prevalence ranging from 6.7% to 24.51% using the same  
158 methodology as this study(12,13). The increase in the prevalence of depressive  
159 symptoms in Brazil mirrors the global trend. A systematic review and meta-analysis by  
160 Chmielewska B. et al. found an increase in EPDS scores when comparing before and  
161 after the COVID-19 pandemic, with a pooled mean difference of 0.42 [95% CI 0.02–0.81;  
162 three studies, 2330 and 6517 pregnancies](14). Therefore, both in Brazil and worldwide,  
163 there was an almost 50% increase in the prevalence of depressive symptoms in the  
164 immediate postpartum period following the onset of the COVID-19 pandemic.

165 Given the statistical analysis, only the variables “lack of spiritual/religious beliefs,”  
166 “having had more than one pregnancy,” “previous episode of depression,” and “previous  
167 episode of anxiety” were significant risk factors for depressive symptoms in the immediate  
168 postpartum period during the COVID-19 pandemic. These factors will be discussed in the  
169 following paragraphs.

170           According to our multivariate regression model, postpartum women without any  
171 spiritual beliefs were 83% more likely to have an EPDS score > 10 in the immediate  
172 postpartum period during the COVID-19 pandemic. It is known that religious participation  
173 and spiritual behaviors are associated with a lower risk of PPD (15,16) and milder  
174 depressive symptoms during this period (15).

175           During the COVID-19 pandemic, the mental health of the general population was  
176 impaired. An integrative review by Cordero et al. showed that religious and spiritual beliefs  
177 might be associated with better coping, fewer mental health problems (stress, anxiety,  
178 depression), and better well-being during the pandemic (17). Additionally, religiosity and  
179 spirituality played an important role in alleviating suffering by minimizing the  
180 consequences of social isolation (18).

181           Regarding postpartum women, there is still a lack of studies that relate  
182 religiosity/spiritual practices, mental health in postpartum women, and the COVID-19  
183 pandemic, making this study one of the first to relate religion/spirituality to depressive  
184 symptoms in the puerperium during the COVID-19 pandemic.

185           Given this significant result from this study, healthcare professionals should be  
186 attentive when attending to and monitoring postpartum women who have experienced the  
187 COVID-19 pandemic. Additionally, further research is needed, as the long-term  
188 consequences of depressive symptoms in the context of the COVID-19 pandemic on the  
189 health of women and their children are still unknown.

190           In our results, being multiparous was a significant risk factor for developing  
191 depressive symptoms during the COVID-19 pandemic, with multiparous women having a

192 50% higher. This finding aligns with the literature, which indicates that multiparous women  
193 are more vulnerable to PPD compared to their first pregnancy. Pre-pandemic studies  
194 already showed that being multiparous increased the likelihood of developing PPD (19–  
195 21). According to a systematic review and meta-analysis conducted during the pandemic  
196 (22), this association persisted in the new context.

197 In Brazilian studies, research conducted in Rio Grande do Sul by Hartmann et al.  
198 applied the EPDS to a sample of 2687 postpartum women and concluded that parity of  
199 two or more was a risk factor for PPD (20). The relationship between the number of  
200 children and PPD may be related to stress and family overload when the woman already  
201 has other children (20).

202 Given these results, healthcare professionals and social workers should be  
203 particularly attentive to multiparous women, considering not only perinatal care but also  
204 the broader social and familial context in which these women live.

205 The presence of past episodes of depression was shown to increase the likelihood  
206 of developing depressive symptoms in the immediate postpartum period (EPDS  $\geq 10$ ) by  
207 64%. Patients with a history of anxiety had an even higher correlation, with 83% of chance.  
208 Thus, past episodes of depression and anxiety were significant risk factors for developing  
209 depressive symptoms. This is because patients who have experienced depression in the  
210 past share common risk factors with PPD, such as socioeconomic fragility, family or  
211 marital problems, and genetic risk factors for depression (23). According to the  
212 biopsychosocial model of depression (24), patients with these risk factors are more likely  
213 to experience depression when faced with a stressful event, such as the arrival of a new  
214 child during the pandemic (25). During the COVID-19 pandemic, it was observed that

215 women reported "the thought of not having my partner with me during birth," "the thought  
216 of my partner having to leave the hospital soon after birth," and "the thought of being  
217 separated from my baby after delivery" as the most frequent anxiety inducing  
218 thoughts(26). Considering these findings, we suggest that past episodes of depression  
219 and/or anxiety be inquired about during prenatal care. Patients with these risk factors  
220 require special attention in the postpartum period

221         The elevated incidence of PPD among women who gave birth during the pandemic  
222 carries significant long-term implications for both maternal and child health. PPD has been  
223 strongly linked to reduced exclusive breastfeeding time (27), less engagement in pediatric  
224 care visits, and greater negligence in completing the child's vaccination schedule (4).  
225 Furthermore, there is a noted delay in the child's development up to 18 months of age, as  
226 well as a 4.7% higher risk of developing depression in adolescence compared to children  
227 of mothers free of PPD symptoms (3). These findings highlight the need for addressing  
228 potential complications in children born during the pandemic.

229         This study has limitations. As a single-center study, it reflects a local perspective  
230 and has limited external validity. Also, the cross-sectional design precludes any  
231 conclusions about the causality or temporal relationships between the identified risk  
232 factors and PPD. On the other hand, the strength of this study relies on a scientific  
233 contribution to a better understanding of women's mental health during the immediate  
234 postpartum period during the COVID-19 pandemic.

235

236

237 **CONCLUSIONS**

238 Positive screening for depressive symptoms in the immediate postpartum period  
239 was frequent and this was associated with previous anxiety, depressive episodes and  
240 number of gestations >1. We highlight that spirituality and religion were found to be  
241 protective factors for depressive symptoms and this can be approached by the  
242 multidisciplinary team.

243

244

245

246

247

248

249 **Authors contributions:**

250 Teruya MM, Carrijo GS, Costa GAM, Silva MH, Valete COS contributed to the research  
251 conception, design, performed data collection, and wrote the manuscript. Valete COS  
252 performed data analysis. Lima JRT, Costa JFSV performed data collection. Strufaldi R  
253 supervised the study.

254

255 **Conflicts of interest:** The authors declare no conflict of interest. This research did not  
256 receive any external funding.



## REFERENCES

1. American Psychiatric Association. Diagnostic and Statistical Manual of Mental Disorders. American Psychiatric Association; 2013.
2. Moraes E, Campos R, Avelino M. Depressive Symptoms in Pregnancy: The Influence of Social, Psychological and Obstetric Aspects. *Revista Brasileira de Ginecologia e Obstetrícia / RBGO Gynecology and Obstetrics*. 2016 Jul 11;38(06):293–300.
3. Arrais ADR, De Araujo TCCF, Schiavo R de A. Depressão e Ansiedade Gestacionais Relacionadas à Depressão Pós-Parto e o Papel Preventivo do Pré-Natal Psicológico. *Revista Psicologia e Saúde*. 2019 Jul 17;23–34.
4. Stewart DE, Vigod SN. Postpartum Depression: Pathophysiology, Treatment, and Emerging Therapeutics. *Annu Rev Med*. 2019 Jan 27;70(1):183–96.
5. Slomian J, Honvo G, Emonts P, Reginster JY, Bruyère O. Consequences of maternal postpartum depression: A systematic review of maternal and infant outcomes. *Women's Health*. 2019 Jan 29;15:174550651984404.
6. Low SR, Bono SA, Azmi Z. Prevalence and Factors of Postpartum Depression During the COVID-19 Pandemic: A Review. *Current Psychology*. 2024 Apr 7;43(13):12084–101.
7. Galletta MAK, Oliveira AM da SS, Albertini JGL, Benute GG, Peres SV, Brizot M de L, et al. Postpartum depressive symptoms of Brazilian women during the COVID-19 pandemic measured by the Edinburgh Postnatal Depression Scale. *J Affect Disord*. 2022 Jan;296:577–86.
8. Cox JL, Holden JM, Sagovsky R. Detection of Postnatal Depression. *British Journal of Psychiatry*. 1987 Jun 2;150(6):782–6.
9. Santos IS, Matijasevich A, Tavares BF, Barros AJD, Botelho IP, Lapolli C, et al. Validation of the Edinburgh Postnatal Depression Scale (EPDS) in a sample of mothers from the 2004 Pelotas Birth Cohort Study. *Cad Saude Publica*. 2007 Nov;23(11):2577–88.
10. Figueira P, Corrêa H, Malloy-Diniz L, Romano-Silva MA. Escala de Depressão Pós-natal de Edimburgo para triagem no sistema público de saúde. *Rev Saude Publica*. 2009 Aug;43(suppl 1):79–84.
11. Malta M, Cardoso LO, Bastos FI, Magnanini MMF, Silva CMFP da. Iniciativa STROBE: subsídios para a comunicação de estudos observacionais. *Rev Saude Publica*. 2010 Jun;44(3):559–65.
12. MONTEIRO KA, GODOI BN, TOLEDO OR, DAVID FL, AVELINO MM, MORAES EV. Evidências de Sintomatologia Depressiva no Pós-Parto Imediato. *Revista Brasileira de Ciências da Saúde*. 2018;22(4):379–88.

13. Poles MM, Carvalheira APP, Carvalhaes MA de BL, Parada CMG de L. Sintomas depressivos maternos no puerpério imediato: fatores associados. *Acta Paulista de Enfermagem*. 2018 Jul;31(4):351–8.
14. Chmielewska B, Barratt I, Townsend R, Kalafat E, van der Meulen J, Gurol-Urganci I, et al. Effects of the COVID-19 pandemic on maternal and perinatal outcomes: a systematic review and meta-analysis. *Lancet Glob Health*. 2021 Jun;9(6):e759–72.
15. Cheadle ACD, Dunkel Schetter C. Mastery, self-esteem, and optimism mediate the link between religiousness and spirituality and postpartum depression. *J Behav Med*. 2018 Oct 31;41(5):711–21.
16. Mann JR, McKeown RE, Bacon J, Vesselinov R, Bush F. Religiosity, Spirituality, and Depressive Symptoms in Pregnant Women. *The International Journal of Psychiatry in Medicine*. 2007 Sep 24;37(3):301–13.
17. de Diego-Cordero R, Ávila-Mantilla A, Vega-Escañó J, Lucchetti G, Badanta B. The Role of Spirituality and Religiosity in Healthcare During the COVID-19 Pandemic: An Integrative Review of the Scientific Literature. *J Relig Health*. 2022 Jun 29;61(3):2168–97.
18. Lucchetti G, Góes LG, Amaral SG, Ganadjian GT, Andrade I, Almeida PO de A, et al. Spirituality, religiosity and the mental health consequences of social isolation during Covid-19 pandemic. *International Journal of Social Psychiatry*. 2021 Sep 2;67(6):672–9.
19. Ruschi GEC, Sun SY, Mattar R, Chambô Filho A, Zandonade E, Lima VJ de. Aspectos epidemiológicos da depressão pós-parto em amostra brasileira. *Revista de Psiquiatria do Rio Grande do Sul*. 2007 Dec;29(3):274–80.
20. Hartmann JM, Mendoza-Sassi RA, Cesar JA. Depressão entre puérperas: prevalência e fatores associados. *Cad Saude Publica*. 2017 Oct 9;33(9).
21. Bassi M, Delle Fave A, Cetin I, Melchiorri E, Pozzo M, Vescoveli F, et al. Psychological well-being and depression from pregnancy to postpartum among primiparous and multiparous women. *J Reprod Infant Psychol*. 2017 Mar 15;35(2):183–95.
22. Yan H, Ding Y, Guo W. Mental Health of Pregnant and Postpartum Women During the Coronavirus Disease 2019 Pandemic: A Systematic Review and Meta-Analysis. *Front Psychol*. 2020 Nov 25;11.
23. Dall’Aglio L, Lewis CM, Pain O. Delineating the Genetic Component of Gene Expression in Major Depression. *Biol Psychiatry*. 2021 Mar;89(6):627–36.
24. Feitosa FB. A depressão pela perspectiva biopsicossocial e a função protetora das habilidades sociais. *Psicologia: Ciência e Profissão*. 2014 Jun;34(2):488–99.
25. Liu CH, Erdei C, Mittal L. Risk factors for depression, anxiety, and PTSD symptoms in perinatal women during the COVID-19 Pandemic. *Psychiatry Res*. 2021 Jan;295:113552.

26. Tauqeer F, Ceulemans M, Gerbier E, Passier A, Oliver A, Foulon V, et al. Mental health of pregnant and postpartum women during the third wave of the COVID-19 pandemic: a European cross-sectional study. *BMJ Open*. 2023 Jan 11;13(1):e063391.
27. Silva CS, Lima MC, Sequeira-de-Andrade LAS, Oliveira JS, Monteiro JS, Lima NMS, et al. Association between postpartum depression and the practice of exclusive breastfeeding in the first three months of life. *J Pediatr (Rio J)*. 2017 Jul;93(4):356–64.
